Title : CONCENTRATING EFFECT OF  $N_2O$  ON ALVEOLAR  $PO_2$  IN LOW  $\dot{V}_A/\dot{Q}$  REGIONS

Authors : R. Dueck, M.D. and P. D. Wagner, M.D.

Affiliation: Departments of Anesthesiology and Internal Medicine, University of California, San Diego and the Veterans Administration Medical Center, San Diego, California 92161.

**Introduction.** Continuing uptake of nitrous oxide (50-60% constant inspired concentration) was recently observed to substantially raise calculated alveolar  $PO_2$  in low  $\dot{V}_A/\dot{Q}$  regions of patients for as long as 4 hours after induction (personal observation). To what extent this phenomenon could impair recognition of  $\dot{V}_A/\dot{Q}$  inequality by blood gas measurements was not known. Therefore we examined the effect of known volumes of  $N_2O$  uptake on alveolar and arterial  $PO_2$  in the sheep, for a modest range of  $\dot{V}_A/\dot{Q}$  inequality.

**Methods.** Alveolar  $PO_2$  values were calculated for 30% (5 sheep) and 40% (1 sheep) inspired oxygen concentrations in compartments of  $\dot{V}_A/\dot{Q} = 0.005$  to 100.0, using a computer program based on that of West (1). This program incorporated measured values of hemoglobin, hematocrit,  $p50$ , mixed venous  $PO_2$ ,  $PCO_2$ , pH, nitrous oxide and halothane tensions, and derived distributions of  $\dot{V}_A/\dot{Q}$  ratios (Ridge regression analysis). In addition, the resulting systemic arterial  $PO_2$  was computed and compared with measured values of arterial  $PO_2$ . For comparison, alveolar and systemic arterial  $PO_2$  values were computed at the same  $F_{IO_2}$  for the same  $\dot{V}_A/\dot{Q}$  distributions, but replacing  $N_2O$  and halothane with nitrogen as the balance gas. Ideal alveolar  $PO_2$  values, determined with nitrogen as the balance gas, were then compared to those computed with  $N_2O$  and halothane as the balance gases.

**Results.** In 21 distributions of  $\dot{V}_A/\dot{Q}$  ratios, with shunt ranging from 1.7 to 23.3% of cardiac output, blood flow to low  $\dot{V}_A/\dot{Q}$  regions from 0.0 to 46.0%, and  $\dot{V}_A/\dot{Q}$  inequality (standard deviation of the distribution of blood flow) from 0.52 to 1.29, calculated alveolar  $PO_2$  in the presence of  $N_2O$  and halothane for units with  $\dot{V}_A/\dot{Q} < 0.5$  exceeded those of the same units when these gases were not breathed. The amount of increase in alveolar  $PO_2$  depended on: (1) the  $\dot{V}_A/\dot{Q}$  ratio, and (2) the rate of anesthetic gas uptake, especially  $N_2O$ . This is illustrated by comparing alveolar  $PO_2$  values from 2 different distributions (see Figure 1A and B) both having comparable values for inspired gas concentrations, shunt, blood flow to low  $\dot{V}_A/\dot{Q}$  regions and cardiac output. Note that the calculated rise in alveolar  $PO_2$  of low  $\dot{V}_A/\dot{Q}$  units when replacing nitrogen with  $N_2O$  and halothane depends greatly on the rate of uptake of  $N_2O$ . This produced rises in the expected arterial  $PO_2$  from 5.2 to 56.7 torr, with a linear relationship being demonstrated for  $\dot{V}_{N_2O}$  (x) and the rise in arterial  $PO_2$  (y)

such that  $y = 7.365x + 87.183$ , regression coefficient = 0.80. See Table I for mean  $\pm$  1 S.D. values. The ideal alveolar-arterial  $PO_2$  gradient, with ideal  $\dot{V}_A/\dot{Q}$  ratios ranging from 0.114 to 0.969, demonstrated 3.3 to 35.4 torr underestimation of (A-a)  $PO_2$  when anesthetic gas uptake was not accounted for.

**Discussion.** Comparison of alveolar and arterial  $PO_2$  values when nitrogen rather than  $N_2O$  and halothane are the balance gases has indicated that continued uptake of anesthetic gases, especially  $N_2O$ , can substantially raise alveolar  $PO_2$  in poorly ventilated but perfused lung regions. This finding implied that standard clinical estimates of  $\dot{V}_A/\dot{Q}$  inequality such as arterial  $PO_2$  and alveolar-arterial  $PO_2$  gradients, without knowledge of the amount of blood flow to low  $\dot{V}_A/\dot{Q}$  units and the volume of uptake of anesthetic gases, may seriously underestimate the degree of ventilation-perfusion mismatching during anesthesia.

#### References.

1. West JB: Ventilation-perfusion inequality and overall gas exchange in computer models of the lung. *Respir Physiol* 7: 88-110, 1969.

TABLE I

| N  | $F_{IO_2}$ | Ideal (A-a) $PO_2$ |                     | Predicted $P_{aO_2}$ |                        | $N_2O$ Uptake (ml/min) |
|----|------------|--------------------|---------------------|----------------------|------------------------|------------------------|
|    |            | Nitrogen           | $N_2O$ +Halo        | Nitrogen             | $N_2O$ +Halo           |                        |
| 3  | 0.4        | 41.2<br>$\pm$ 31.8 | 72.1<br>$\pm$ 23.5  | 136.0<br>$\pm$ 12.8  | 163.9<br>$\pm$ 13.0    | 268.3<br>$\pm$ 93.3    |
| 18 | 0.3        | 35.2<br>$\pm$ 10.5 | *50.3<br>$\pm$ 06.3 | 110.8<br>$\pm$ 14.2  | *132.92<br>$\pm$ 26.70 | 256.9<br>$\pm$ 125.3   |

\*significant difference  $p < 0.01$ , paired t analysis

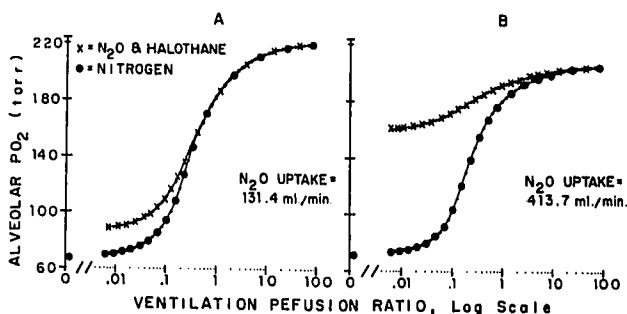

Source: https://asa2.silverchair.com/anesthesiology/article-pdf/51/3/S371/624319/0000542-197909001-00370.pdf
